# Supplementary material
Source: Research Square preprint supplement (doi:10.21203/rs.3.rs-9843108/v1)
Supplement: Supplementary file 1 [file 613d410f5afd403b95ea55d5.docx]

## 9. SUPPLEMENTARY


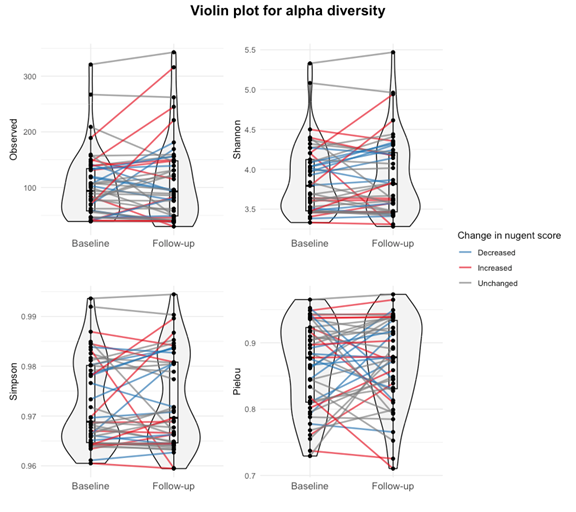

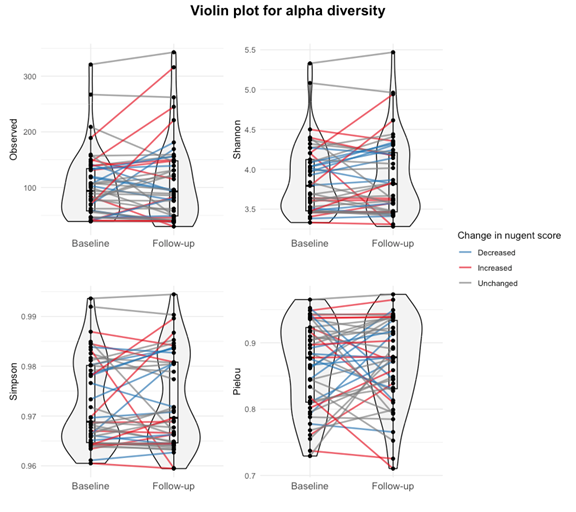

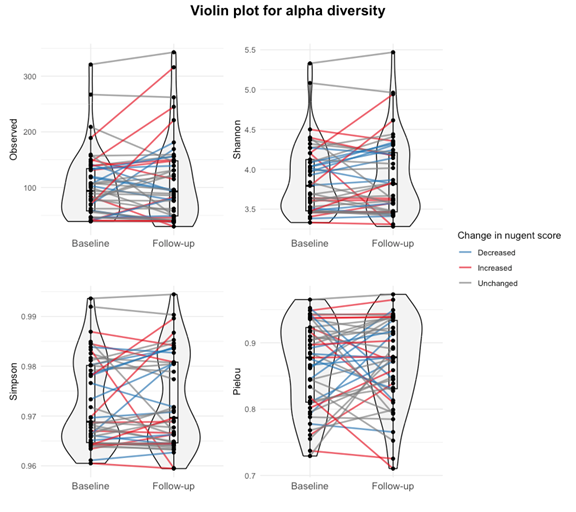


- **Supplementary Figure 1. Differences in alpha-diversity before and after probiotic use** Observed ASVs: No significant change (p>0.05) Shannon index: No significant change (p>0.05) Simpson index: No significant change (p>0.05) Pielou’s evenness: No significant change (p>0.05)


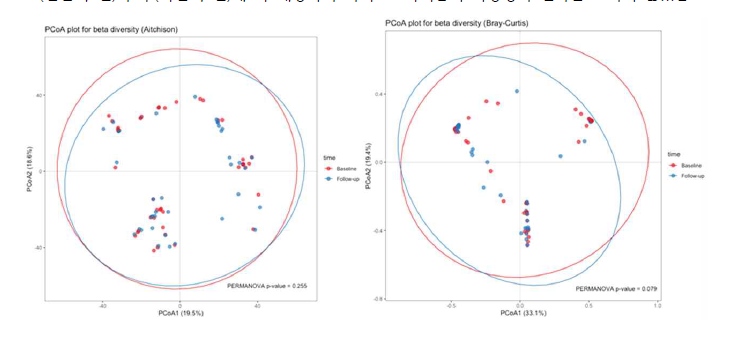


**Supplementary Figure 2. Differences in beta-diversity before and after probiotic use**
